# Supplementary material for: Skin T cells maintain their diversity and functionality in the elderly
Source: PubMed Central journal article supplement (PMC7782613; doi:10.1038/s42003-020-01551-7), 2021-01-04
Supplement: 42003_2020_1551_MOESM2_ESM.pdf [file 42003_2020_1551_MOESM2_ESM.pdf]

Supplementary information

**Title: Skin T cells maintain their diversity and functionality in the elderly**

**Authors:**

Hanako Koguchi-Yoshioka<sup>1,2</sup>, Elena Hoffer<sup>3</sup>, Stanley Cheuk<sup>3</sup>, Yutaka Matsumura<sup>1</sup>, Sa Vo<sup>1</sup>, Petra Kjellman<sup>4</sup>, Lucian Grema<sup>4</sup>, Yosuke Ishitsuka<sup>1</sup>, Yoshiyuki Nakamura<sup>1</sup>, Naoko Okiyama<sup>1</sup>, Yasuhiro Fujisawa<sup>1</sup>, Manabu Fujimoto<sup>1,2</sup>, Liv Eidsmo<sup>3,4†</sup>, Rachael A. Clark<sup>5†</sup>, and Rei Watanabe<sup>1,2†</sup>.

†These authors jointly supervised this work.

**Affiliations:**

<sup>1</sup>Department of Dermatology, Faculty of Medicine, University of Tsukuba, Ibaraki, Japan

1-1-1 Tennodai, Tsukuba, Ibaraki 305-8575, Japan

<sup>2</sup>Department of Dermatology, Course of Integrated Medicine, Graduate School of Medicine, Osaka University, Osaka, Japan

2-2 Yamadaoka, Suita, Osaka, 565-0871

<sup>3</sup>Division of Rheumatology, Department of Medicine Solna, Karolinska Institutet, Solna, Sweden

Visionsgatan 18, L8, 171 76, Solna, Sweden

<sup>4</sup>Diagnostiskt Centrum Hud, Stockholm, Sweden

Apelbergsgatan 60, 111 37, Stockholm, Sweden

<sup>5</sup>Department of Dermatology, Brigham and Women's Hospital, Boston, MA, USA  
75 Francis St, Boston, MA 02115, USA

Corresponding author: Rei Watanabe, MD, PhD

Department of Dermatology, Faculty of Medicine, University of Tsukuba, 1-1-1 Tennodai, Tsukuba, Ibaraki 305-8575, Japan

**E-mail address:** [rwatanabe@md.tsukuba.ac.jp](mailto:rwatanabe@md.tsukuba.ac.jp)

**Present address:** Department of Dermatology, Course of Integrated Medicine, Graduate School of Medicine, Osaka University, Osaka, Japan

2-2 Yamadaoka, Suita, Osaka, 565-0871

## Supplementary Figures

### Supplementary Figure 1. Phenotypical and functional alteration of T cells in aged blood and skin

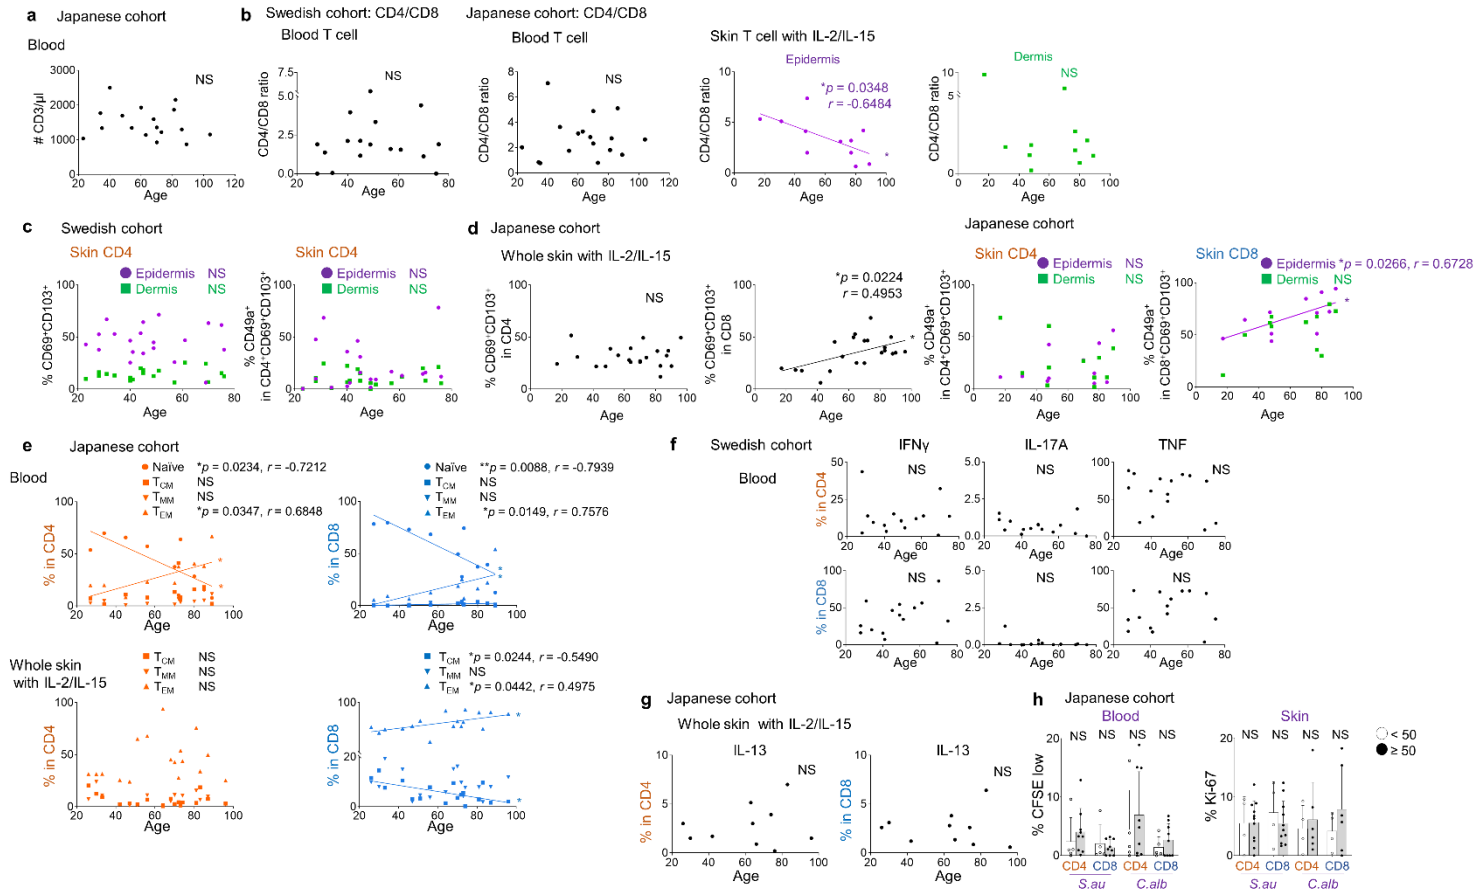

- CD3<sup>+</sup> numbers/μl blood (Japanese). N = 17.
- CD4/CD8 ratio in blood, epidermal, and dermal T cells (Swedish and Japanese). Swedish: blood: n = 17; Japanese: blood: n = 17, skin: n = 11.
- CD69/CD103 expression in CD4<sup>+</sup> and CD49a expression in CD69<sup>+</sup>CD103<sup>+</sup>CD4<sup>+</sup> from epidermis and dermis (Swedish). N = 20.
- Whole skin with IL-2/IL-15: CD69/CD103 expression in CD4<sup>+</sup> and CD8<sup>+</sup> from whole skin (Japanese). N = 21. Skin CD4 and CD8: CD49a expression in CD69<sup>+</sup>CD103<sup>+</sup>CD4<sup>+</sup> and CD69<sup>+</sup>CD103<sup>+</sup>CD8<sup>+</sup> from epidermis and dermis (Japanese). N = 11.
- Blood: The ratios of naïve T cells (CD45RA<sup>+</sup>CD45RO<sup>-</sup>), T<sub>CM</sub> (CD45RO<sup>+</sup>CCR7<sup>+</sup>CD62L<sup>+</sup>), migratory memory T cells (T<sub>MM</sub>, CD45RO<sup>+</sup>CCR7<sup>+</sup>CD62L<sup>-</sup>), and T<sub>EM</sub> (CD45RO<sup>+</sup>CCR7<sup>-</sup>) in blood CD4<sup>+</sup> and CD8<sup>+</sup> (Japanese). N=10. Whole skin with IL-2/IL-15: T<sub>CM</sub> (CCR7<sup>+</sup>CD62L<sup>+</sup>),

T<sub>MM</sub> (CCR7<sup>+</sup>CD62L<sup>-</sup>), T<sub>EM</sub> (CCR7<sup>-</sup> CD62L<sup>-</sup>) in whole skin CD4<sup>+</sup> and CD8<sup>+</sup> (Japanese). N = 17.

- f) The production ratios of IFN $\gamma$ , IL-17A, and TNF in blood CD4<sup>+</sup> and CD8<sup>+</sup> (Swedish). N = 15.
- g) IL-13 production from skin CD4<sup>+</sup> and CD8<sup>+</sup> (Japanese). N = 10.
- h) Proliferative activities of T cells from blood and skin cultured with heat-killed *S.au* or *C.alb*, as in Fig. 2a. Blood T cells were evaluated by CFSE levels, and skin T cells, by Ki-67 expression. Error bars indicate standard deviations. Blood: n = 14; skin: *S.au*: n = 15, *C.alb*: n = 10.

Spearman rank correlation coefficients (two-tailed) were performed in a - g and Mann-Whitney test (two-tailed) was applied in h. NS: not significant, \* $p < 0.05$ , \*\* $p < 0.01$ .

Supplementary Figure 2. Subanalyses of T-cell phenotypes from the head vs the trunk and from the flap edge vs the transplant skin specimens of participants aged older than 50 years

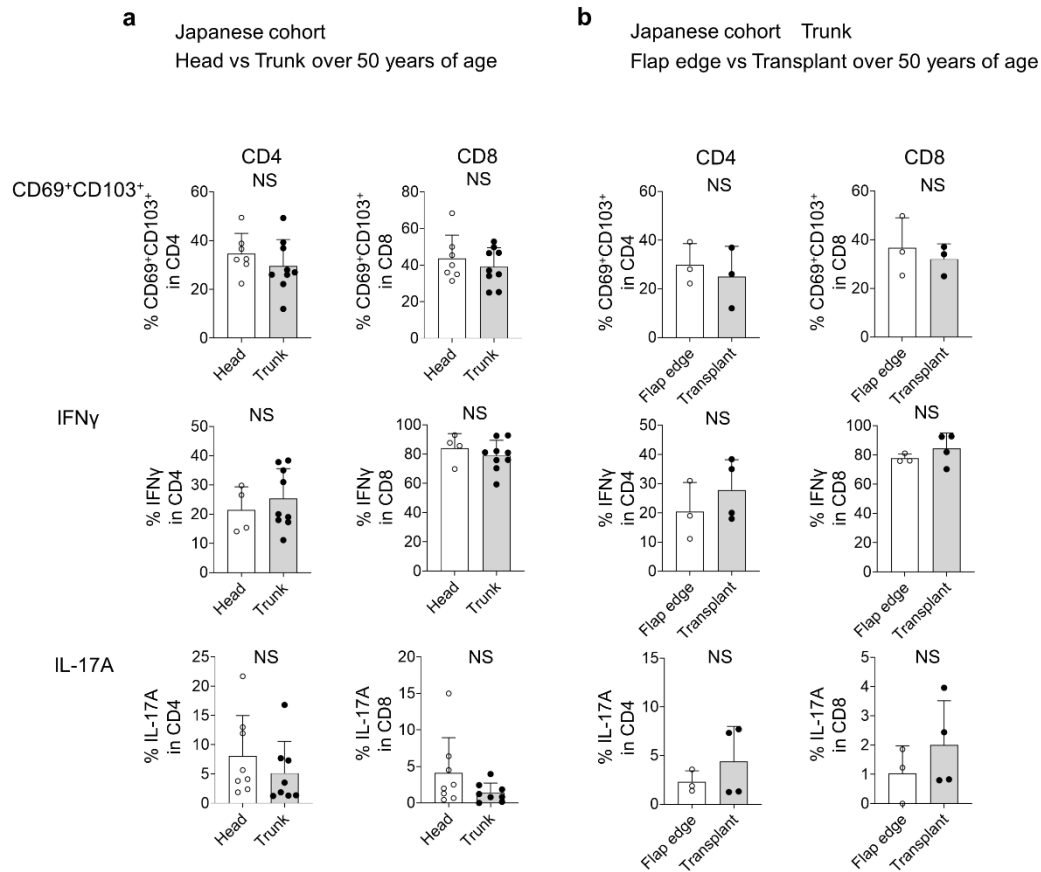

The samples are from Japanese participants. Error bars indicate standard deviations.

- T<sub>RM</sub> phenotypes and production of IFN $\gamma$  and IL-17A were compared between T cells from the head (white dots) and the trunk (black dots) specimens. The participants were extracted from the analyses shown in Fig. 1d and Supplementary Figure 1d. CD69<sup>+</sup>103<sup>+</sup>: n = 16, IFN $\gamma$ : n = 13, IL-17A: n = 16.
- T<sub>RM</sub> phenotypes and cytokine production profiles were compared between T cells from flap edge (white dots) and transplant samples (black dots). The participants were extracted from the analyses shown in Fig. 1d and Supplementary Figure 1d. CD69<sup>+</sup>103<sup>+</sup>: n = 6, IFN $\gamma$ : n = 7, IL-17A: n = 7. NS: not significant.

Mann-Whitney tests (two-tailed) were performed.

## Supplementary Figure 3. Gating strategies in flow cytometry

Gating strategies

**a** Fig 1, 2, Supplementary Figure 1, 2

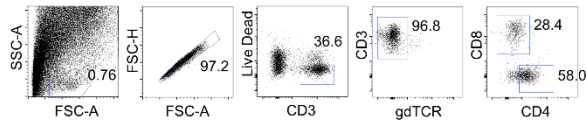

**b** Fig 1c,  
Supplementary Figure 1c, 1d, 2

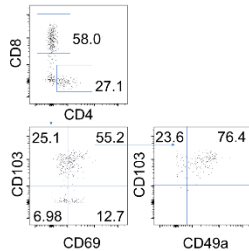

**c** Fig 1d,  
Supplementary Figure 1f, 1g, 2

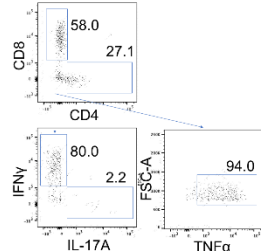

**d** Supplementary Figure 1e  
Blood

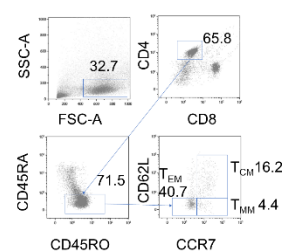

**e** Supplementary Figure 1e  
Skin

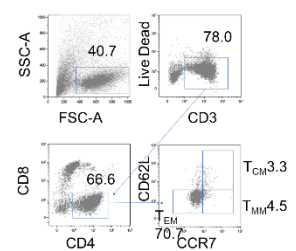

**f** Fig 2a, Supplementary Figure 1h

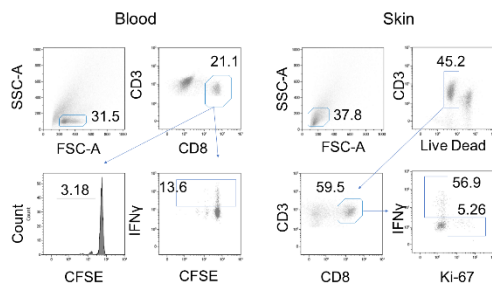

- Identification of T cells, CD4<sup>+</sup>, and CD8<sup>+</sup> cells in Fig. 1, 2, Supplementary Figure 1, and Supplementary Figure 2.
- Identification of skin T<sub>RM</sub> in Fig. 1c, Supplementary Figure 1c, 1d, and 2.
- Cytokine production from T cells in blood, epidermis, and dermis in Fig. 1d, Supplementary Figure 1f, 1g, and 2.
- Identification of blood T<sub>CM</sub>, T<sub>MM</sub>, and T<sub>EM</sub> in Supplementary Figure 1e.
- Identification of skin T<sub>CM</sub>, T<sub>MM</sub>, and T<sub>EM</sub> in Supplementary Figure 1e.
- CFSE reduction and cytokine production in blood T cells and Ki-67 expression and cytokine production in skin T cells in Fig. 2a and Supplementary Figure 1h.

Supplementary Table 1.

Lists of the participants. The participants whose data were used in the different analyses are shown in gray from the second time.

Body sites: head (H), trunk (T), upper extremities (U), and lower extremities (L).

Skin diseases: benign or in situ malignant (basal cell carcinoma [BCC] and squamous cell carcinoma in situ (actinic keratosis [AK]/Bowen).

Figure 1a (skin: n = 9 from Japanese)

| Age | Body site | Skin disease            | Flap edge or transplant |
|-----|-----------|-------------------------|-------------------------|
| 57  | T         | Benign                  | Edge                    |
| 20  | H         | Benign                  | Edge                    |
| 72  | T         | Benign                  | Edge                    |
| 68  | T         | Benign                  | Edge                    |
| 40  | U         | Benign                  | Edge                    |
| 80  | H         | In situ malignant (BCC) | Edge                    |
| 85  | H         | In situ malignant (BCC) | Edge                    |
| 36  | U         | Benign                  | Edge                    |
| 92  | H         | In situ malignant (BCC) | Edge                    |

Figure 1b, 1c (skin: n = 20 from Swedish)

|     |
|-----|
| Age |
| 49  |
| 49  |
| 70  |
| 69  |
| 41  |
| 45  |
| 40  |
| 57  |
| 51  |
| 44  |
| 40  |
| 45  |
| 76  |
| 75  |

|    |
|----|
| 23 |
| 31 |
| 61 |
| 28 |
| 34 |
| 28 |

Figure 1d IFN $\gamma$ , IL-17A (skin: n = 18 from Swedish)

| Age |
|-----|
| 49  |
| 49  |
| 70  |
| 69  |
| 41  |
| 45  |
| 40  |
| 57  |
| 51  |
| 44  |
| 40  |
| 75  |
| 23  |
| 31  |
| 61  |
| 28  |
| 34  |
| 28  |

Figure 1d TNF (skin: n = 16 from Swedish)

| Age |
|-----|
| 49  |
| 49  |
| 70  |
| 69  |



|    |
|----|
| 41 |
| 45 |
| 40 |
| 57 |
| 51 |
| 75 |
| 23 |
| 31 |
| 61 |
| 28 |
| 34 |
| 28 |

Figure 1d IFN $\gamma$  (skin: n = 18 from Japanese)

| Age | Body site | Skin disease                 | Flap edge or transplant |
|-----|-----------|------------------------------|-------------------------|
| 72  | T         | Benign                       | Transplant              |
| 74  | H         | In situ malignant (BCC)      | Transplant              |
| 64  | T         | Benign                       | Edge                    |
| 96  | H         | In situ malignant (AK/Bowen) | Edge                    |
| 30  | U         | Benign                       | Edge                    |
| 87  | T         | Benign                       | Edge                    |
| 86  | H         | In situ malignant (AK/Bowen) | Edge                    |
| 83  | H         | In situ malignant (AK/Bowen) | Edge                    |
| 42  | T         | In situ malignant (AK/Bowen) | Transplant              |
| 26  | T         | Benign                       | Edge                    |
| 17  | H         | Benign                       | Edge                    |
| 48  | H         | Benign                       | Edge                    |
| 63  | T         | In situ malignant (AK/Bowen) | Edge                    |
| 65  | T         | In situ malignant (AK/Bowen) | Edge                    |
| 90  | T         | In situ malignant (AK/Bowen) | Edge                    |
| 88  | T         | Benign                       | Transplant              |
| 70  | T         | Benign                       | Transplant              |
| 83  | T         | Benign                       | Transplant              |

Figure 1d IL-17A (skin: n = 21 from Japanese)

| Age | Body site | Skin disease                 | Flap edge or transplant |
|-----|-----------|------------------------------|-------------------------|
| 72  | T         | Benign                       | Transplant              |
| 87  | H         | Benign                       | Edge                    |
| 74  | H         | In situ malignant (BCC)      | Transplant              |
| 64  | T         | Benign                       | Edge                    |
| 96  | H         | In situ malignant (AK/Bowen) | Edge                    |
| 30  | U         | Benign                       | Edge                    |
| 87  | T         | Benign                       | Edge                    |
| 86  | H         | In situ malignant (AK/Bowen) | Edge                    |
| 83  | H         | In situ malignant (AK/Bowen) | Edge                    |
| 42  | T         | In situ malignant (AK/Bowen) | Transplant              |
| 51  | H         | Benign                       | Edge                    |
| 26  | T         | Benign                       | Edge                    |
| 17  | H         | Benign                       | Edge                    |
| 85  | H         | In situ malignant (AK/Bowen) | Edge                    |
| 48  | H         | Benign                       | Edge                    |
| 63  | T         | In situ malignant (AK/Bowen) | Edge                    |
| 65  | T         | In situ malignant (AK/Bowen) | Edge                    |
| 90  | T         | In situ malignant (AK/Bowen) | Edge                    |
| 88  | T         | Benign                       | Transplant              |
| 70  | T         | Benign                       | Transplant              |
| 83  | T         | Benign                       | Transplant              |

Figure 1d TNF (skin: n = 16 from Japanese)

| Age | Body site | Skin disease                 | Flap edge or transplant |
|-----|-----------|------------------------------|-------------------------|
| 72  | T         | Benign                       | Transplant              |
| 84  | H         | In situ malignant (BCC)      | Transplant              |
| 74  | H         | In situ malignant (BCC)      | Transplant              |
| 64  | T         | Benign                       | Edge                    |
| 96  | H         | In situ malignant (AK/Bowen) | Edge                    |
| 30  | U         | Benign                       | Edge                    |
| 87  | H         | Benign                       | Edge                    |
| 86  | H         | In situ malignant (AK/Bowen) | Edge                    |

|    |   |                              |            |
|----|---|------------------------------|------------|
| 83 | H | In situ malignant (AK/Bowen) | Edge       |
| 42 | T | In situ malignant (AK/Bowen) | Transplant |
| 51 | H | Benign                       | Edge       |
| 26 | T | Benign                       | Edge       |
| 17 | H | Benign                       | Edge       |
| 85 | H | In situ malignant (AK/Bowen) | Edge       |
| 48 | H | Benign                       | Edge       |
| 87 | T | Benign                       | Edge       |

Figure 2a, Supplementary Figure 1h (blood: n = 14 from Japanese)

|     |
|-----|
| Age |
| 59  |
| 68  |
| 29  |
| 48  |
| 31  |
| 34  |
| 40  |
| 60  |
| 63  |
| 81  |
| 68  |
| 68  |
| 82  |
| 104 |

Figure 2A, Supplementary Figure 1H (*S.au*-injected skin: n = 15 from Japanese)

| Age | Body site | Skin disease                 | Flap edge or transplant |
|-----|-----------|------------------------------|-------------------------|
| 25  | T         | Benign                       | Edge                    |
| 20  | H         | Benign                       | Edge                    |
| 34  | H         | Benign                       | Edge                    |
| 60  | T         | In situ malignant (BCC)      | Transplant              |
| 75  | L         | In situ malignant (AK/Bowen) | Edge                    |
| 75  | L         | In situ malignant (AK/Bowen) | Edge                    |

|    |   |                              |            |
|----|---|------------------------------|------------|
| 81 | T | In situ malignant (AK/Bowen) | Transplant |
| 96 | L | In situ malignant (AK/Bowen) | Transplant |
| 83 | T | In situ malignant (BCC)      | Transplant |
| 93 | T | In situ malignant (AK/Bowen) | Transplant |
| 71 | T | In situ malignant (BCC)      | Transplant |
| 91 | L | In situ malignant (BCC)      | Transplant |
| 83 | T | In situ malignant (BCC)      | Transplant |
| 84 | T | In situ malignant (AK/Bowen) | Transplant |
| 41 | T | In situ malignant (BCC)      | Transplant |

Figure 2a, Supplementary Figure 1h (*C.alb*-injected skin: n = 10 from Japanese)

| Age | Body site | Skin disease                 | Flap edge or transplant |
|-----|-----------|------------------------------|-------------------------|
| 93  | T         | In situ malignant (AK/Bowen) | Transplant              |
| 71  | T         | In situ malignant (BCC)      | Transplant              |
| 83  | T         | In situ malignant (BCC)      | Transplant              |
| 84  | T         | In situ malignant (AK/Bowen) | Transplant              |
| 41  | T         | In situ malignant (BCC)      | Transplant              |
| 88  | T         | In situ malignant (AK/Bowen) | Transplant              |
| 76  | T         | In situ malignant (BCC)      | Transplant              |
| 44  | T         | Benign                       | Edge                    |
| 35  | H         | Benign                       | Edge                    |
| 48  | T         | Benign                       | Edge                    |

Figure 3, 4 (blood and skin: n = 16 from Japanese)

| Age | Body site | Skin disease                 | Flap edge or transplant |
|-----|-----------|------------------------------|-------------------------|
| 46  | T         | Benign                       | Edge                    |
| 57  | T         | Benign                       | Edge                    |
| 73  | T         | In situ malignant (AK/Bowen) | Edge                    |
| 57  | U         | Benign                       | Edge                    |
| 66  | H         | In situ malignant (BCC)      | Edge                    |
| 41  | T         | Benign                       | Edge                    |
| 79  | H         | Benign                       | Edge                    |
| 20  | H         | Benign                       | Edge                    |
| 48  | T         | Benign                       | Edge                    |

|    |   |                              |      |
|----|---|------------------------------|------|
| 90 | H | In situ malignant (AK/Bowen) | Edge |
| 83 | T | Benign                       | Edge |
| 90 | H | In situ malignant (AK/Bowen) | Edge |
| 88 | H | In situ malignant (AK/Bowen) | Edge |
| 42 | T | Benign                       | Edge |
| 84 | T | In situ malignant (BCC)      | Edge |
| 26 | T | Benign                       | Edge |

Supplementary Figure 1a, 1b (blood: n = 17 from Japanese)

|     |
|-----|
| Age |
| 23  |
| 34  |
| 40  |
| 60  |
| 63  |
| 68  |
| 81  |
| 86  |
| 89  |
| 82  |
| 104 |
| 70  |
| 48  |
| 70  |
| 35  |
| 54  |
| 73  |

Supplementary Figure 1b, 1c (blood (n = 17) or skin (n = 20) from Swedish)

| Skin | Blood |
|------|-------|
| Age  | Age   |
| 49   | 49    |
| 49   | 49    |
| 70   | 70    |

|    |    |
|----|----|
| 69 | 69 |
| 41 | 41 |
| 45 | 45 |
| 40 | 40 |
| 57 | 57 |
| 51 | 51 |
| 44 |    |
| 40 |    |
| 45 | 45 |
| 76 | 76 |
| 75 | 75 |
| 23 |    |
| 31 | 31 |
| 61 | 61 |
| 28 | 28 |
| 34 | 34 |
| 28 | 28 |

Supplementary Figure 1b, 1d (skin: n = 11 from Japanese)

| Age | Body site | Skin disease                 | Flap edge or transplant |
|-----|-----------|------------------------------|-------------------------|
| 47  | T         | Benign                       | Edge                    |
| 77  | T         | In situ malignant (BCC)      | Transplant              |
| 31  | T         | Benign                       | Edge                    |
| 70  | L         | In situ malignant (BCC)      | Transplant              |
| 17  | H         | Benign                       | Edge                    |
| 48  | U         | Benign                       | Edge                    |
| 85  | H         | In situ malignant (AK/Bowen) | Edge                    |
| 77  | U         | Benign                       | Edge                    |
| 80  | H         | In situ malignant (BCC)      | Edge                    |
| 48  | U         | Benign                       | Edge                    |
| 89  | T         | In situ malignant (AK/Bowen) | Transplant              |

Supplementary Figure 1d (whole skin: n = 21 from Japanese)

| Age | Body site | Skin disease                 | Flap edge or transplant |
|-----|-----------|------------------------------|-------------------------|
| 72  | T         | Benign                       | Transplant              |
| 56  | H         | Benign                       | Edge                    |
| 87  | H         | Benign                       | Edge                    |
| 74  | H         | In situ malignant (BCC)      | Transplant              |
| 64  | T         | Benign                       | Edge                    |
| 96  | H         | In situ malignant (AK/Bowen) | Edge                    |
| 83  | H         | In situ malignant (AK/Bowen) | Edge                    |
| 81  | H         | In situ malignant (BCC)      | Edge                    |
| 51  | H         | Benign                       | Edge                    |
| 70  | T         | In situ malignant (BCC)      | Edge                    |
| 63  | T         | In situ malignant (AK/Bowen) | Edge                    |
| 65  | T         | In situ malignant (AK/Bowen) | Edge                    |
| 90  | T         | In situ malignant (AK/Bowen) | Edge                    |
| 88  | T         | Benign                       | Transplant              |
| 70  | T         | Benign                       | Transplant              |
| 83  | T         | Benign                       | Transplant              |
| 30  | U         | Benign                       | Edge                    |
| 42  | T         | In situ malignant (AK/Bowen) | Transplant              |
| 26  | T         | Benign                       | Edge                    |
| 17  | H         | Benign                       | Edge                    |
| 48  | H         | Benign                       | Edge                    |

Supplementary Figure 1e (blood: n = 10 from Japanese)

|     |
|-----|
| Age |
| 27  |
| 34  |
| 45  |
| 56  |
| 70  |
| 72  |
| 73  |
| 80  |

|    |
|----|
| 85 |
| 89 |

Supplementary Figure 1e (skin: n = 17 from Japanese)

| Age | Body site | Skin disease                 | Flap edge or transplant |
|-----|-----------|------------------------------|-------------------------|
| 72  | T         | Benign                       | Transplant              |
| 56  | H         | Benign                       | Edge                    |
| 87  | H         | Benign                       | Edge                    |
| 74  | H         | In situ malignant (BCC)      | Transplant              |
| 64  | T         | Benign                       | Edge                    |
| 96  | H         | In situ malignant (AK/Bowen) | Edge                    |
| 30  | U         | Benign                       | Edge                    |
| 83  | H         | In situ malignant (AK/Bowen) | Edge                    |
| 68  | L         | In situ malignant (AK/Bowen) | Edge                    |
| 42  | T         | In situ malignant (AK/Bowen) | Transplant              |
| 81  | H         | In situ malignant (BCC)      | Edge                    |
| 47  | H         | Benign                       | Edge                    |
| 51  | H         | Benign                       | Edge                    |
| 26  | T         | Benign                       | Edge                    |
| 33  | U         | Benign                       | Edge                    |
| 73  | L         | In situ malignant (BCC)      | Edge                    |
| 70  | T         | In situ malignant (BCC)      | Edge                    |

Supplementary Figure 1f (blood: n = 15 from Swedish)

|       |
|-------|
| Blood |
| Age   |
| 49    |
| 49    |
| 70    |
| 69    |
| 41    |
| 45    |
| 40    |
| 57    |



|    |
|----|
| 51 |
| 75 |
| 31 |
| 61 |
| 28 |
| 34 |
| 28 |

Supplementary Figure 1g IL-13 (skin: n = 10 from Japanese)

| Age | Body site | Skin disease                 | Flap edge or transplant |
|-----|-----------|------------------------------|-------------------------|
| 74  | H         | In situ malignant (BCC)      | Transplant              |
| 64  | T         | Benign                       | Edge                    |
| 96  | H         | In situ malignant (AK/Bowen) | Edge                    |
| 30  | U         | Benign                       | Edge                    |
| 83  | H         | In situ malignant (AK/Bowen) | Edge                    |
| 42  | T         | In situ malignant (AK/Bowen) | Transplant              |
| 26  | T         | Benign                       | Edge                    |
| 76  | T         | In situ malignant (BCC)      | Transplant              |
| 63  | L         | In situ malignant (AK/Bowen) | Edge                    |
| 66  | T         | In situ malignant (BCC)      | Transplant              |

Supplementary Figure 2a CD69<sup>+</sup>CD103<sup>+</sup> (skin: n = 16 from Japanese)

| Age | Body site | Skin disease                 | Flap edge or transplant |
|-----|-----------|------------------------------|-------------------------|
| 72  | T         | Benign                       | Transplant              |
| 56  | H         | Benign                       | Edge                    |
| 87  | H         | Benign                       | Edge                    |
| 74  | H         | In situ malignant (BCC)      | Transplant              |
| 64  | T         | Benign                       | Edge                    |
| 96  | H         | In situ malignant (AK/Bowen) | Edge                    |
| 83  | H         | In situ malignant (AK/Bowen) | Edge                    |
| 81  | H         | In situ malignant (BCC)      | Edge                    |
| 51  | H         | Benign                       | Edge                    |
| 70  | T         | In situ malignant (BCC)      | Edge                    |
| 63  | T         | In situ malignant (AK/Bowen) | Edge                    |

|    |   |                              |            |
|----|---|------------------------------|------------|
| 65 | T | In situ malignant (AK/Bowen) | Edge       |
| 90 | T | In situ malignant (AK/Bowen) | Edge       |
| 88 | T | Benign                       | Transplant |
| 70 | T | Benign                       | Transplant |
| 83 | T | Benign                       | Transplant |

Supplementary Figure 2a IFN $\gamma$  (skin: n = 13 from Japanese)

| Age | Body site | Skin disease                 | Flap edge or transplant |
|-----|-----------|------------------------------|-------------------------|
| 72  | T         | Benign                       | Transplant              |
| 74  | H         | In situ malignant (BCC)      | Transplant              |
| 64  | T         | Benign                       | Edge                    |
| 96  | H         | In situ malignant (AK/Bowen) | Edge                    |
| 87  | T         | Benign                       | Edge                    |
| 86  | H         | In situ malignant (AK/Bowen) | Edge                    |
| 83  | H         | In situ malignant (AK/Bowen) | Edge                    |
| 63  | T         | In situ malignant (AK/Bowen) | Edge                    |
| 65  | T         | In situ malignant (AK/Bowen) | Edge                    |
| 90  | T         | In situ malignant (AK/Bowen) | Edge                    |
| 88  | T         | Benign                       | Transplant              |
| 70  | T         | Benign                       | Transplant              |
| 83  | T         | Benign                       | Transplant              |

Supplementary Figure 2a IL-17A (skin: n = 16 from Japanese)

| Age | Body site | Skin disease                 | Flap edge or transplant |
|-----|-----------|------------------------------|-------------------------|
| 72  | T         | Benign                       | Transplant              |
| 87  | H         | Benign                       | Edge                    |
| 74  | H         | In situ malignant (BCC)      | Transplant              |
| 64  | T         | Benign                       | Edge                    |
| 96  | H         | In situ malignant (AK/Bowen) | Edge                    |
| 87  | H         | Benign                       | Edge                    |
| 86  | H         | In situ malignant (AK/Bowen) | Edge                    |
| 83  | H         | In situ malignant (AK/Bowen) | Edge                    |
| 51  | H         | Benign                       | Edge                    |
| 85  | H         | In situ malignant (AK/Bowen) | Edge                    |

|    |   |                              |            |
|----|---|------------------------------|------------|
| 63 | T | In situ malignant (AK/Bowen) | Edge       |
| 65 | T | In situ malignant (AK/Bowen) | Edge       |
| 90 | T | In situ malignant (AK/Bowen) | Edge       |
| 88 | T | Benign                       | Transplant |
| 70 | T | Benign                       | Transplant |
| 83 | T | Benign                       | Transplant |

Supplementary Figure 2b (skin: n = 7 from Japanese)

| Age | Body site | Skin disease                 | Flap edge or transplant |
|-----|-----------|------------------------------|-------------------------|
| 63  | T         | In situ malignant (AK/Bowen) | Edge                    |
| 65  | T         | In situ malignant (AK/Bowen) | Edge                    |
| 90  | T         | In situ malignant (AK/Bowen) | Edge                    |
| 72  | T         | Benign                       | Transplant              |
| 88  | T         | Benign                       | Transplant              |
| 70  | T         | Benign                       | Transplant              |
| 83  | T         | Benign                       | Transplant              |

Supplementary Table 2.

List of antibodies used for flow cytometry analyses.

| Antibodies   | Clone     | Type       | Species | Supplier       |
|--------------|-----------|------------|---------|----------------|
| CD3          | SK7       | Monoclonal | Mouse   | eBioscience    |
| CD4          | RPA-T4    | Monoclonal | Mouse   | eBioscience    |
| CD8a         | RPA-T8    | Monoclonal | Mouse   | eBioscience    |
| CD62L        | DREG56    | Monoclonal | Mouse   | eBioscience    |
| CCR7         | G043H7    | Monoclonal | Mouse   | BioLegend      |
| CD45RA       | HI100     | Monoclonal | Mouse   | BioLegend      |
| CD45RO       | UCHL1     | Monoclonal | Mouse   | BioLegend      |
| CD69         | FN50      | Monoclonal | Mouse   | BioLegend      |
| CD49a        | SR84      | Monoclonal | Mouse   | BD Biosciences |
| CD103        | Ber-ACT8  | Monoclonal | Mouse   | BioLegend      |
| IFN $\gamma$ | 4S.B3     | Monoclonal | Mouse   | BioLegend      |
| IL-17A       | BL168     | Monoclonal | Mouse   | BioLegend      |
| TNF $\alpha$ | MAb11     | Monoclonal | Mouse   | BioLegend      |
| Ki-67        | Ki-67     | Monoclonal | Mouse   | BioLegend      |
| IL-13        | JES10-5A2 | Monoclonal | Mouse   | BioLegend      |

Supplementary Table 3.

List of the statistics and exact *p* and *r* values, mean ± standard deviations when applicable.

Figure 1a

Statistics: Spearman rank correlation coefficient

|                   | <i>p</i> value (two-tailed) | <i>r</i> value |
|-------------------|-----------------------------|----------------|
| CD3 in epidermis  | 0.0028                      | 0.8806         |
| CD3 in dermis     | 0.9405                      | 0.03405        |
| CD3 in whole skin | 0.2140                      | 0.4603         |
| CD4 in epidermis  | 0.0016                      | 0.9093         |
| CD4 in dermis     | 0.7961                      | -0.1022        |
| CD4 in whole skin | 0.1968                      | 0.483          |
| CD8 in epidermis  | 0.0206                      | 0.7694         |
| CD8 in dermis     | 0.6077                      | 0.1975         |
| CD8 in whole skin | 0.2108                      | 0.4642         |

Figure 1b

Statistics: Spearman rank correlation coefficient

|                      | <i>p</i> value (two-tailed) | <i>r</i> value |
|----------------------|-----------------------------|----------------|
| CD4/CD8 in epidermis | 0.0349                      | -0.4736        |
| CD4/CD8 in dermis    | 0.1831                      | -0.3102        |

Figure 1c

Statistics: Spearman rank correlation coefficient

|                                                                   | <i>p</i> value (two-tailed) | <i>r</i> value |
|-------------------------------------------------------------------|-----------------------------|----------------|
| <%CD69 <sup>+</sup> CD103 <sup>+</sup> in CD8>                    |                             |                |
| Epidermis                                                         | 0.9523                      | 0.01431        |
| Dermis                                                            | 0.0335                      | 0.4768         |
| <%CD49a <sup>+</sup> in CD69 <sup>+</sup> CD103 <sup>+</sup> CD8> |                             |                |
| Epidermis                                                         | 0.0224                      | 0.5075         |
| Dermis                                                            | 0.7476                      | -0.07681       |

Figure 1d

Statistics: Spearman rank correlation coefficient

|                              | <i>p</i> value (two-tailed) | <i>r</i> value |
|------------------------------|-----------------------------|----------------|
| <Epidermis>                  |                             |                |
| %IFN $\gamma$ in CD4         | 0.1960                      | 0.3405         |
| %IL-17A in CD4               | 0.3795                      | -0.2343        |
| %TNF in CD4                  | 0.2094                      | -0.3568        |
| %IFN $\gamma$ in CD8         | 0.4402                      | 0.2063         |
| %IL-17A in CD8               | 0.0490                      | -0.4700        |
| %TNF in CD8                  | 0.4368                      | -0.2247        |
| <Dermis>                     |                             |                |
| %IFN $\gamma$ in CD4         | 0.8111                      | 0.06485        |
| %IL-17A in CD4               | 0.0284                      | -0.5527        |
| %TNF in CD4                  | 0.1630                      | -0.3943        |
| %IFN $\gamma$ in CD8         | 0.9366                      | 0.02211        |
| %IL-17A in CD8               | 0.0062                      | -0.6837        |
| %TNF in CD8                  | 0.9896                      | -0.00441       |
| <Whole skin with IL-2/IL-15> |                             |                |
| %IFN $\gamma$ in CD4         | 0.2589                      | -0.2808        |
| %IL-17A in CD4               | 0.0042                      | -0.5973        |
| %TNF in CD4                  | 0.1420                      | 0.3841         |
| %IFN $\gamma$ in CD8         | 0.0118                      | 0.5483         |
| %IL-17A in CD8               | 0.0196                      | -0.5049        |
| %TNF in CD8                  | 0.3989                      | 0.2252         |

Figure 2a

Statistics: Mann-Whitney test

mean  $\pm$  standard deviations

|                       | <i>p</i> value (two-tailed) | < 50              | $\geq$ 50         |
|-----------------------|-----------------------------|-------------------|-------------------|
| < <i>S.au</i> Blood>  |                             |                   |                   |
| %IFN $\gamma$ in CD4  | 0.0290                      | 5.200 $\pm$ 3.428 | 1.474 $\pm$ 1.108 |
| %IFN $\gamma$ in CD8  | >0.9999                     | 17.82 $\pm$ 21.18 | 16.89 $\pm$ 17.19 |
| < <i>S.au</i> Skin>   |                             |                   |                   |
| %IFN $\gamma$ in CD4  | 0.8513                      | 22.80 $\pm$ 26.11 | 14.17 $\pm$ 9.922 |
| %IFN $\gamma$ in CD8  | 0.9451                      | 29.58 $\pm$ 22.76 | 29.97 $\pm$ 22.39 |
| < <i>C.alb</i> Blood> |                             |                   |                   |
| %IFN $\gamma$ in CD4  | 0.0020                      | 6.580 $\pm$ 3.493 | 1.526 $\pm$ 0.996 |
| %IFN $\gamma$ in CD8  | >0.9999                     | 24.38 $\pm$ 13.65 | 26.52 $\pm$ 19.98 |
| < <i>C.au</i> Skin>   |                             |                   |                   |
| %IFN $\gamma$ in CD4  | 0.9143                      | 8.480 $\pm$ 7.620 | 10.17 $\pm$ 10.02 |
| %IFN $\gamma$ in CD8  | 0.3524                      | 31.15 $\pm$ 26.35 | 36.19 $\pm$ 20.43 |
| < <i>S.au</i> Blood>  |                             |                   |                   |
| %IL-17A in CD4        | 0.0140                      | 1.806 $\pm$ 1.271 | 0.540 $\pm$ 0.415 |
| %IL-17A in CD8        | 0.7238                      | 0.806 $\pm$ 1.140 | 0.864 $\pm$ 0.925 |
| < <i>S.au</i> Skin>   |                             |                   |                   |
| %IL-17A in CD4        | 0.1703                      | 1.683 $\pm$ 0.571 | 4.398 $\pm$ 3.381 |
| %IL-17A in CD8        | 0.5769                      | 0.926 $\pm$ 0.660 | 0.986 $\pm$ 0.710 |
| < <i>C.alb</i> Blood> |                             |                   |                   |
| %IL-17A in CD4        | 0.0310                      | 4.662 $\pm$ 2.514 | 1.672 $\pm$ 1.080 |
| %IL-17A in CD8        | 0.0290                      | 4.064 $\pm$ 1.994 | 1.586 $\pm$ 1.048 |
| < <i>C.alb</i> Skin>  |                             |                   |                   |
| %IL-17A in CD4        | 0.7619                      | 4.070 $\pm$ 2.099 | 6.553 $\pm$ 6.469 |
| %IL-17A in CD8        | 0.6571                      | 3.243 $\pm$ 3.741 | 1.803 $\pm$ 1.305 |

Figure 3b, 3c, 3d

Statistics: Spearman rank correlation coefficient

|                 | <i>p</i> value (two-tailed) | <i>r</i> value |
|-----------------|-----------------------------|----------------|
| Figure 3b blood | 0.2838                      | -0.2842        |
| Figure 3b skin  | 0.8974                      | 0.03535        |
|                 | <i>p</i> value (two-tailed) | <i>r</i> value |
| Figure 3c blood | 0.0130                      | -0.6141        |
| Figure 3c skin  | 0.8887                      | 0.03829        |
|                 | <i>p</i> value (two-tailed) | <i>r</i> value |
| Figure 3d blood | 0.0652                      | 0.4742         |
| Figure 3d skin  | 0.5386                      | -0.1654        |

Figure 3e

Statistics: 2-way ANOVA followed by Tukey multiple comparisons test

|         | <i>p</i> value  |                  |                   |
|---------|-----------------|------------------|-------------------|
|         | Young vs Middle | Young vs Elderly | Middle vs Elderly |
| <Blood> |                 |                  |                   |
| Top 1   | 0.7807          | 0.9067           | 0.9690            |
| Top 5   | 0.0959          | 0.3359           | 0.7884            |
| Top 10  | 0.0299          | 0.1146           | 0.8418            |
| Top 15  | 0.0133          | 0.0520           | 0.8660            |
| Top 20  | 0.0073          | 0.0320           | 0.8604            |
| <Skin>  |                 |                  |                   |
| Top 1   | 0.9997          | 0.8612           | 0.8610            |
| Top 5   | 0.3163          | 0.9913           | 0.4125            |
| Top 10  | 0.1252          | 0.7542           | 0.452             |
| Top 15  | 0.1085          | 0.7525           | 0.4151            |
| Top 20  | 0.1136          | 0.7632           | 0.4173            |

Figure 4b

Statistics: Spearman rank correlation coefficient

|       | <i>p</i> value (two-tailed) | <i>r</i> value |
|-------|-----------------------------|----------------|
| Blood | 0.0065                      | 0.6613         |
| Skin  | 0.1216                      | 0.4035         |



Supplementary Figure 1a

Statistics: Spearman rank correlation coefficient

|              | <i>p</i> value (two-tailed) | <i>r</i> value |
|--------------|-----------------------------|----------------|
| CD3 in blood | 0.5958                      | -0.2132        |

Supplementary Figure 1b

Statistics: Spearman rank correlation coefficient

|                                 | <i>p</i> value (two-tailed) | <i>r</i> value |
|---------------------------------|-----------------------------|----------------|
| CD4/CD8 in blood (Swedish)      | 0.6676                      | 0.1117         |
| CD4/CD8 in blood (Japanese)     | 0.7458                      | 0.08461        |
| CD4/CD8 in epidermis (Japanese) | 0.0348                      | -0.6484        |
| CD4/CD8 in dermis (Japanese)    | 0.4284                      | -0.2648        |

Supplementary Figure 1c

Statistics: Spearman rank correlation coefficient

|                                                                   | <i>p</i> value (two-tailed) | <i>r</i> value |
|-------------------------------------------------------------------|-----------------------------|----------------|
| <%CD69 <sup>+</sup> CD103 <sup>+</sup> in CD4>                    |                             |                |
| Epidermis                                                         | 0.9410                      | -0.0177        |
| Dermis                                                            | 0.7001                      | 0.09187        |
| <%CD49a <sup>+</sup> in CD69 <sup>+</sup> CD103 <sup>+</sup> CD4> |                             |                |
| Epidermis                                                         | 0.4712                      | 0.1709         |
| Dermis                                                            | 0.8180                      | 0.05497        |

Supplementary Figure 1d

Statistics: Spearman rank correlation coefficient

|                                                                   | <i>p</i> value (two-tailed) | <i>r</i> value |
|-------------------------------------------------------------------|-----------------------------|----------------|
| <Whole skin>                                                      |                             |                |
| %CD69 <sup>+</sup> CD103 <sup>+</sup> in CD4                      | 0.8142                      | 0.0546         |
| %CD69 <sup>+</sup> CD103 <sup>+</sup> in CD8                      | 0.0224                      | 0.4953         |
| <%CD49a <sup>+</sup> in CD69 <sup>+</sup> CD103 <sup>+</sup> CD4> |                             |                |
| Epidermis                                                         | 0.4532                      | 0.2511         |
| Dermis                                                            | 0.7075                      | -0.1279        |
| <%CD49a <sup>+</sup> in CD69 <sup>+</sup> CD103 <sup>+</sup> CD8> |                             |                |
| Epidermis                                                         | 0.0266                      | 0.6728         |
| Dermis                                                            | 0.0875                      | 0.5434         |

Supplementary Figure 1e

Statistics: Spearman rank correlation coefficient

|                              | <i>p</i> value (two-tailed) | <i>r</i> value |
|------------------------------|-----------------------------|----------------|
| <Blood>                      |                             |                |
| %Naïve T in CD4              | 0.0234                      | -0.7212        |
| %T <sub>CM</sub> in CD4      | 0.2768                      | 0.3818         |
| %T <sub>MM</sub> in CD4      | 0.0734                      | 0.6000         |
| %T <sub>EM</sub> in CD4      | 0.0347                      | 0.6848         |
| %Naïve T in CD8              | 0.0088                      | -0.7939        |
| %T <sub>CM</sub> in CD8      | 0.3129                      | 0.3576         |
| %T <sub>MM</sub> in CD8      | 0.2182                      | 0.4303         |
| %T <sub>EM</sub> in CD8      | 0.0149                      | 0.7576         |
| <Whole skin with IL-2/IL-15> |                             |                |
| %T <sub>CM</sub> in CD4      | 0.8241                      | -0.05882       |
| %T <sub>MM</sub> in CD4      | 0.8315                      | 0.05637        |
| %T <sub>EM</sub> in CD4      | 0.4727                      | 0.1863         |
| %T <sub>CM</sub> in CD8      | 0.0244                      | -0.5490        |
| %T <sub>MM</sub> in CD8      | 0.8020                      | -0.0662        |
| %T <sub>EM</sub> in CD8      | 0.0442                      | 0.4975         |

Supplementary Figure 1f

Statistics: Mann-Whitney test

|                      | <i>p</i> value (two-tailed) | <i>r</i> value |
|----------------------|-----------------------------|----------------|
| %IFN $\gamma$ in CD4 | 0.8881                      | 0.07699        |
| %IL-17A in CD4       | 0.3277                      | 0.2402         |
| %TNF in CD4          | 0.9546                      | -0.3077        |
| %IFN $\gamma$ in CD8 | 0.4559                      | 0.2773         |
| %IL-17A in CD8       | 0.4338                      | -0.3376        |
| %TNF in CD8          | 0.4559                      | 0.1914         |

Supplementary Figure 1g

Statistics: Spearman rank correlation coefficient

|               | <i>p</i> value (two-tailed) | <i>r</i> value |
|---------------|-----------------------------|----------------|
| %IL-13 in CD4 | 0.8845                      | -0.05488       |
| %IL-13 in CD8 | 0.4842                      | -0.2492        |

Supplementary Figure 1h

| Statistics: Mann-Whitney test | <i>p</i> value (two-tailed) | mean ± standard deviations |               |
|-------------------------------|-----------------------------|----------------------------|---------------|
|                               |                             | < 50                       | ≥ 50          |
| < <i>S.au</i> Blood>          |                             |                            |               |
| %CFSE low in CD4              | 0.3636                      | 2.410 ± 4.065              | 4.069 ± 3.967 |
| %CFSE low in CD8              | 0.9241                      | 2.024 ± 3.024              | 1.371 ± 1.308 |
| < <i>C.alb</i> Blood>         |                             |                            |               |
| %CFSE low in CD4              | 0.6324                      | 4.442 ± 6.746              | 6.940 ± 7.420 |
| %CFSE low in CD8              | 0.7902                      | 1.408 ± 1.769              | 2.651 ± 2.794 |
| < <i>S.au</i> Skin>           |                             |                            |               |
| %Ki-67 in CD4                 | 0.8740                      | 5.493 ± 4.578              | 5.676 ± 3.661 |
| %Ki-67 in CD8                 | 0.7333                      | 7.373 ± 5.175              | 5.521 ± 3.735 |
| < <i>C.alb</i> Skin>          |                             |                            |               |
| %Ki-67 in CD4                 | 0.9143                      | 8.480 ± 7.620              | 10.17 ± 10.02 |
| %Ki-67 in CD8                 | 0.7619                      | 4.188 ± 3.141              | 7.855 ± 7.507 |

Supplementary Figure 2a

| Statistics: Mann-Whitney test              | <i>p</i> value (two-tailed) | mean ± standard deviations |               |
|--------------------------------------------|-----------------------------|----------------------------|---------------|
|                                            |                             | < 50                       | ≥ 50          |
| %CD69 <sup>+</sup> 103 <sup>+</sup> in CD4 | 0.2991                      | 34.63 ± 8.362              | 29.54 ± 10.81 |
| %CD69 <sup>+</sup> 103 <sup>+</sup> in CD8 | 0.6260                      | 43.75 ± 12.61              | 39.14 ± 10.32 |
| %IFN $\gamma$ in CD4                       | 0.4140                      | 21.45 ± 7.900              | 25.29 ± 10.25 |
| %IFN $\gamma$ in CD8                       | 0.4140                      | 84.03 ± 9.987              | 78.99 ± 10.44 |
| %IL-17A in CD4                             | 0.1749                      | 8.069 ± 6.918              | 78.99 ± 10.44 |
| %IL-17A in CD8                             | 0.2359                      | 4.096 ± 4.846              | 1.409 ± 1.314 |

Supplementary Figure 2b

| Statistics: Mann-Whitney test              | <i>p</i> value (two-tailed) | mean ± standard deviations |               |
|--------------------------------------------|-----------------------------|----------------------------|---------------|
|                                            |                             | < 50                       | ≥ 50          |
| %CD69 <sup>+</sup> 103 <sup>+</sup> in CD4 | 0.7000                      | 29.86 ± 8.682              | 24.99 ± 12.49 |
| %CD69 <sup>+</sup> 103 <sup>+</sup> in CD8 | 0.7000                      | 36.68 ± 12.33              | 32.05 ± 6.287 |
| %IFN $\gamma$ in CD4                       | 0.4000                      | 20.37 ± 10.01              | 27.85 ± 10.34 |
| %IFN $\gamma$ in CD8                       | 0.4000                      | 77.69 ± 3.001              | 84.40 ± 10.64 |
| %IL-17A in CD4                             | >0.9999                     | 2.273 ± 1.152              | 4.395 ± 3.600 |
| %IL-17A in CD8                             | 0.6286                      | 1.030 ± 0.946              | 2.008 ± 1.510 |
