# Supplementary material for: Skin T cells maintain their diversity and functionality in the elderly
Source: PubMed Central journal article supplement (PMC7782613; doi:10.1038/s42003-020-01551-7), 2021-01-04
Supplement: 42003_2020_1551_MOESM3_ESM.pdf [file 42003_2020_1551_MOESM3_ESM.pdf]

## **Description of Additional Supplementary Files**

File Name: Supplementary Data 1

Description: Raw data for the graphs in Figure 1

File Name: Supplementary Data 2

Description: Raw data for the graphs in Figure 2

File Name: Supplementary Data 3

Description: Raw data for the graphs in Figure 3

File Name: Supplementary Data 4

Description: Raw data for the graphs in Figure 4

File Name: Supplementary Data 5

Description: Raw data for the graphs in Supplementary Figure 1

File Name: Supplementary Data 6

Description: Raw data for the graphs in Supplementary Figure 2
