# Supplementary material for: Skin T cells maintain their diversity and functionality in the elderly
Source: PubMed Central journal article supplement (PMC7782613; doi:10.1038/s42003-020-01551-7), 2021-01-04
Supplement: 42003_2020_1551_MOESM4_ESM.pdf [file 42003_2020_1551_MOESM4_ESM.pdf]

| a   |           |        |            |  |
|-----|-----------|--------|------------|--|
| CD3 |           |        |            |  |
| Age | Epidermis | Dermis | Whole skin |  |
| 57  | 3.0       | 5.0    | 8.0        |  |
| 20  | 3.0       | 8.0    | 11.0       |  |
| 72  | 4.0       | 2.0    | 6.0        |  |
| 68  | 7.0       | 8.0    | 15.0       |  |
| 40  | 2.0       | 5.0    | 7.0        |  |
| 80  | 7.0       | 3.0    | 10.0       |  |
| 85  | 9.0       | 5.0    | 14.0       |  |
| 36  | 3.0       | 4.0    | 7.0        |  |
| 92  | 9.0       | 13.0   | 22.0       |  |

| CD4 |           |        |            |  |
|-----|-----------|--------|------------|--|
| Age | Epidermis | Dermis | Whole skin |  |
| 57  | 1.0       | 1.7    | 2.7        |  |
| 20  | 1.0       | 5.0    | 6.0        |  |
| 72  | 2.0       | 1.0    | 3.0        |  |
| 68  | 3.0       | 6.0    | 9.0        |  |
| 40  | 1.0       | 3.0    | 4.0        |  |
| 80  | 4.0       | 2.3    | 6.3        |  |
| 85  | 5.0       | 1.0    | 6.0        |  |
| 36  | 1.0       | 2.0    | 3.0        |  |
| 92  | 4.0       | 9.0    | 13.0       |  |

| CD8 |           |        |            |  |
|-----|-----------|--------|------------|--|
| Age | Epidermis | Dermis | Whole skin |  |
| 57  | 2.0       | 3.0    | 5.0        |  |
| 20  | 2.0       | 3.0    | 5.0        |  |
| 72  | 2.0       | 1.3    | 3.3        |  |
| 68  | 4.0       | 2.0    | 6.0        |  |
| 40  | 1.0       | 1.7    | 2.7        |  |
| 80  | 3.0       | 1.0    | 4.0        |  |
| 85  | 4.0       | 4.0    | 8.0        |  |
| 36  | 2.0       | 2.0    | 4.0        |  |
| 92  | 5.0       | 4.0    | 9.0        |  |

| b   |           |          |
|-----|-----------|----------|
| Age | Epidermis | Dermis   |
| 49  | 3.8186813 | 2.705556 |
| 49  | 2.6095238 | 2.004651 |
| 70  | 1.4713897 | 0.895954 |
| 69  | 1.5314465 | 0.532847 |
| 41  | 1.8571429 | 2.608295 |
| 45  | 3.0772947 | 1.017647 |
| 40  | 2.0868167 | 1.613260 |
| 57  | 1.3300971 | 1.342960 |
| 51  | 3.1269036 | 1.610837 |
| 44  | 1.7977099 | 2.554455 |
| 40  | 2.2384342 | 0.970639 |
| 45  | 0.5093697 | 0.604770 |
| 76  | 0.3487545 | 0.124557 |
| 75  | 0.6918239 | 0.844633 |
| 23  | 5.4677419 | 2.218884 |
| 31  | 1.3029491 | 0.989218 |
| 61  | 0.4672414 | 15.82353 |
| 28  | 2.7329546 | 3.380000 |
| 34  | 3.5816327 | 2.243655 |
| 28  | 1.4323529 | 0.437819 |

| c   |           |        |
|-----|-----------|--------|
| Age | Epidermis | Dermis |
| 49  | 62.5      | 20.1   |
| 49  | 44.2      | 27.6   |
| 70  | 3.35      | 54.6   |
| 69  | 19.1      | 24.2   |
| 41  | 57.2      | 12.2   |
| 45  | 74.3      | 19.6   |
| 40  | 39.9      | 11.4   |
| 57  | 59.7      | 16.1   |
| 51  | 65.9      | 18.5   |
| 44  | 81.5      | 18.5   |
| 40  | 49.9      | 18.1   |
| 45  | 21.5      | 2.2    |
| 76  | 35.7      | 15.5   |
| 75  | 72.9      | 7.99   |
| 23  | 43.2      | 6.54   |
| 31  | 57.3      | 6.85   |
| 61  | 55.2      | 15.6   |
| 28  | 31.5      | 13.0   |
| 34  | 54.2      | 14.1   |
| 28  | 52.6      | 12.8   |

| Skin CD8 |           |        |
|----------|-----------|--------|
| Age      | Epidermis | Dermis |
| 49       | 68.6      | 2.41   |
| 49       | 69.6      | 1.32   |
| 70       | 63.1      | 2.24   |
| 69       | 55.2      | 5.12   |
| 41       | 78.1      | 2.56   |
| 45       | 60.0      | 1.12   |
| 40       | 54.8      | 1.03   |
| 57       | 79.9      | 5.27   |
| 51       | 45.3      | 0.48   |
| 44       | 78.8      | 22.0   |
| 40       | 70.4      | 45.0   |
| 45       | 83.3      | 38.3   |
| 76       | 91.7      | 4.55   |
| 75       | 74.6      | 23.7   |
| 23       | 53.4      | 11.9   |
| 31       | 68.5      | 25.0   |
| 61       | 76.4      | 39.1   |
| 28       | 9.59      | 0.87   |
| 34       | 33.5      | 9.28   |
| 28       | 47.7      | 11.0   |

| d         |                  |        |                  |        |            |        |            |        |           |        |           |        |  |
|-----------|------------------|--------|------------------|--------|------------|--------|------------|--------|-----------|--------|-----------|--------|--|
| Epidermis |                  |        |                  |        |            |        |            |        |           |        |           |        |  |
| Age       | CD4 IFN $\gamma$ |        | CD8 IFN $\gamma$ |        | CD4 IL-17A |        | CD8 IL-17A |        | CD4 TNF   |        | CD8 TNF   |        |  |
|           | Epidermis        | Dermis | Epidermis        | Dermis | Epidermis  | Dermis | Epidermis  | Dermis | Epidermis | Dermis | Epidermis | Dermis |  |
| 49        | 5.61             | 9.44   | 41.1             | 59.1   | 5.14       | 3.25   | 0.00       | 0.17   | 41.1      | 57.3   | 57.1      | 79.0   |  |
| 49        | 8.82             | 10.5   | 51.9             | 44.7   | 7.35       | 0.00   | 3.85       | 3.95   | 69.9      | 43.4   | 75.0      | 73.7   |  |
| 70        | 14.1             | 8.32   | 30.6             | 7.48   | 1.41       | 0.71   | 0.35       | 0.21   | 28.3      | 21.2   | 25.3      | 9.43   |  |
| 69        | 7.62             | 19.0   | 21.9             | 17.7   | 2.23       | 1.47   | 0.85       | 0.17   | 19.3      | 41.6   | 59.5      | 61.7   |  |
| 41        | 24.7             | 4.92   | 26.6             | 9.98   | 11.0       | 2.64   | 1.85       | 0.53   | 37.8      | 19.5   | 40.2      | 14.5   |  |
| 45        | 4.26             | 8.21   | 23.4             | 38.9   | 2.78       | 0.99   | 1.14       | 0.27   | 43.7      | 37.9   | 44.0      | 96.1   |  |
| 40        | 14.9             | 10.4   | 20.2             | 29.3   | 0.79       | 0.74   | 4.92       | 1.03   | 43.5      | 31     | 39.3      | 54.6   |  |
| 57        | 4.66             | 5.20   | 10.1             | 45.7   | 3.21       | 0.75   | 1.16       | 0.00   | 25.7      | 26.3   | 38.4      | 93.3   |  |
| 51        | 20.0             | 5.47   | 38.9             | 26.0   | 10.5       | 2.14   | 3.79       | 0.64   | 60.7      | 28.6   | 73.0      | 96.1   |  |
| 44        | 0.84             | 4.33   | 13.4             | 30.7   | 7.14       | 2.02   | 3.03       | 0.89   |           |        |           |        |  |
| 40        | 0.13             | 2.79   | 1.79             | 9.94   | 1.13       | 6.75   | 0.15       | 0.68   |           |        |           |        |  |
| 75        | 1.83             | 2.21   | 2.00             | 11.0   | 10.0       | 2.00   | 0.00       | 0.80   | 9.0       | 15.0   | 9.0       | 28.0   |  |
| 23        | 12.2             | 16.4   | 41.4             | 40.1   | 13.5       | 7.15   | 2.96       | 2.40   | 62.5      | 67.0   | 82.8      | 86.6   |  |
| 31        | 3.69             | 23.4   | 52.0             | 56.1   | 32.5       | 5.44   | 8.19       | 0.36   | 85.5      | 73.3   | 89.0      | 87.7   |  |
| 61        | 23.1             | 18.6   | 80.0             | 42.8   | 19.7       | 6.21   | 2.22       | 0.00   | 72.0      | 70.0   | 94.0      | 97.1   |  |
| 28        | 0.48             | 11.4   | 9.48             | 24.0   | 8.56       | 3.74   | 3.88       | 1.31   | 33.3      | 43.2   | 47.8      | 77.1   |  |
| 34        | 0.071            | 0.81   | 3.32             | 3.57   | 1.00       | 2.00   | 0.20       | 0.80   | 5.0       | 10.0   | 10.0      | 17.0   |  |
| 28        | 6.30             | 4.52   | 21.5             | 16.1   | 4.57       | 5.59   | 3.70       | 1.17   | 52.8      | 58.3   | 60.0      | 76.0   |  |

| Whole skin with IL-2/IL-15 |                  |      |     |            |      |     |         |         |         |  |
|----------------------------|------------------|------|-----|------------|------|-----|---------|---------|---------|--|
| Age                        | CD4 IFN $\gamma$ |      | Age | CD4 IL-17A |      | Age | CD4 TNF |         | CD8 TNF |  |
|                            | CD8 IFN $\gamma$ | Age  |     | CD8 IL-17A | Age  |     | CD8 TNF | CD8 TNF |         |  |
| 72                         | 38.4             | 70.3 | 72  | 7.32       | 3.96 | 72  | 91.4    | 91.5    |         |  |
| 74                         | 26.5             | 87.7 | 87  | 5.68       | 0.66 | 84  | 76.5    | 87.9    |         |  |
| 64                         | 37.8             | 59.3 | 74  | 21.7       | 4.50 | 87  | 77.0    | 79.0    |         |  |
| 96                         | 14.1             | 69.8 | 64  | 16.8       | 0.15 | 74  | 90.0    | 95.6    |         |  |
| 30                         | 34.3             | 32.3 | 96  | 1.88       | 2.50 | 64  | 81.6    | 87.5    |         |  |
| 87                         | 17.3             | 81.0 | 30  | 6.20       | 4.90 | 96  | 91.0    | 95.0    |         |  |
| 86                         | 15.4             | 93.0 | 87  | 3.81       | 1.99 | 30  | 80.0    | 89.0    |         |  |
| 83                         | 29.8             | 85.6 | 86  | 4.13       | 0.44 | 87  | 87.0    | 96.5    |         |  |
| 42                         | 31.9             | 25.8 | 83  | 12.0       | 1.29 | 86  | 61.5    | 60.9    |         |  |
| 26                         | 15.4             | 24.8 | 42  | 9.73       | 23.6 | 83  | 68.9    | 81.5    |         |  |
| 17                         | 25.0             | 60.2 | 51  | 13.0       | 15.0 | 42  | 68.6    | 59.8    |         |  |
| 48                         | 14.4             | 71.1 | 26  | 19.0       | 10.7 | 51  | 61.0    | 78.4    |         |  |
| 88                         | 35.0             | 53.0 | 17  | 11.1       | 6.00 | 26  | 46.3    | 71.2    |         |  |
| 70                         | 18.0             | 52.2 | 85  | 2.40       | 6.40 | 17  | 76.5    | 88.3    |         |  |
| 83                         | 20.0             | 64.0 | 48  | 15.6       | 8.47 | 85  | 86.6    | 89.0    |         |  |
| 63                         | 19.0             | 60.0 | 63  | 1.37       | 1.86 | 48  | 77.7    | 95.4    |         |  |
| 65                         | 31.0             | 48.0 | 65  | 3.57       | 0.00 |     |         |         |         |  |
| 90                         | 11.1             | 68.0 | 90  | 1.88       | 1.23 |     |         |         |         |  |
|                            |                  |      | 88  | 1.25       | 0.83 |     |         |         |         |  |
|                            |                  |      | 70  | 7.70       | 0.80 |     |         |         |         |  |
|                            |                  |      | 83  | 1.31       | 2.44 |     |         |         |         |  |
