# Supplementary material for: Skin T cells maintain their diversity and functionality in the elderly
Source: PubMed Central journal article supplement (PMC7782613; doi:10.1038/s42003-020-01551-7), 2021-01-04
Supplement: 42003_2020_1551_MOESM5_ESM.pdf [file 42003_2020_1551_MOESM5_ESM.pdf]

a

*S.au*

IFN $\gamma$

<50

|           |       |       |      |       |      |
|-----------|-------|-------|------|-------|------|
| Blood CD4 | 10.32 | 5.11  | 6.27 | 2.87  | 1.43 |
| Blood CD8 | 16.77 | 9.10  | 7.84 | 54.37 | 1.03 |
| Skin CD4  | 8.18  | 59.0  | 24.0 | 0.00  |      |
| Skin CD8  | 11.28 | 39.76 | 56.9 | 10.37 |      |

$\geq 50$

|           |       |       |       |       |       |       |       |       |       |       |
|-----------|-------|-------|-------|-------|-------|-------|-------|-------|-------|-------|
| Blood CD4 | 1.69  | 2.15  | 2.10  | 2.21  | 2.84  | 0.11  | 0.00  | 0.04  |       |       |
| Blood CD8 | 19.89 | 54.2  | 30.47 | 15.0  | 13.85 | 1.18  | 0.89  | 0.68  |       |       |
| Skin CD4  | 37.36 | 8.64  | 22.35 | 17.50 | 10.20 | 12.90 | 3.53  | 7.09  | 18.40 | 2.43  |
| Skin CD8  | 11.10 | 33.57 | 25.00 | 6.13  | 67.74 | 59.12 | 14.58 | 60.00 | 20.29 | 25.00 |

*C. alb*

IFN $\gamma$

<50

|           |       |       |       |       |       |
|-----------|-------|-------|-------|-------|-------|
| Blood CD4 | 8.27  | 4.26  | 11.58 | 6.13  | 2.66  |
| Blood CD8 | 13.50 | 14.35 | 17.07 | 44.60 | 32.40 |
| Skin CD4  | 2.09  | 3.70  | 18.97 | 9.16  |       |
| Skin CD8  | 15.53 | 21.43 | 70.5  | 17.14 |       |

$\geq 50$

|           |       |       |       |       |       |       |      |      |      |  |
|-----------|-------|-------|-------|-------|-------|-------|------|------|------|--|
| Blood CD4 | 1.99  | 2.33  | 3.24  | 2.4   | 1.27  | 0.49  | 0.72 | 0.52 | 0.77 |  |
| Blood CD8 | 34.80 | 16.00 | 58.30 | 43.70 | 41.40 | 30.60 | 3.80 | 4.10 | 6.00 |  |
| Skin CD4  | 28.00 | 5.26  | 12.94 | 3.33  | 11.49 | 0.00  |      |      |      |  |
| Skin CD8  | 22.00 | 22.86 | 70.80 | 38.24 | 46.86 | 16.4  |      |      |      |  |

*S.au*

IL-17A

<50

|           |      |      |      |      |      |
|-----------|------|------|------|------|------|
| Blood CD4 | 3.87 | 0.88 | 2.15 | 0.81 | 1.32 |
| Blood CD8 | 0.42 | 0.22 | 0.34 | 2.84 | 0.21 |
| Skin CD4  | 1.92 | 1.93 | 2.05 | 0.83 |      |
| Skin CD8  | 1.50 | 0.22 | 0.51 | 1.48 |      |

$\geq 50$

|           |      |      |      |      |      |      |      |       |      |       |      |
|-----------|------|------|------|------|------|------|------|-------|------|-------|------|
| Blood CD4 | 0.27 | 1.04 | 0.81 | 1.36 | 0.15 | 0.41 | 0.14 | 0.17  | 0.44 |       |      |
| Blood CD8 | 1.88 | 0.61 | 0.81 | 2.86 | 0.21 | 0.54 | 0.00 | 0.19  | 0.68 |       |      |
| Skin CD4  | 1.83 | 2.30 | 3.29 | 1.02 | 2.50 | 0.45 | 6.45 | 10.26 | 2.36 | 12.09 | 5.83 |
| Skin CD8  | 1.40 | 0.00 | 0.70 | 0.00 | 0.97 | 1.61 | 1.46 | 0.00  | 1.67 | 1.19  | 1.85 |

*C. alb*

IL-17A

<50

|           |      |      |      |      |      |
|-----------|------|------|------|------|------|
| Blood CD4 | 7.69 | 4.26 | 0.77 | 5.26 | 5.33 |
| Blood CD8 | 6    | 1.82 | 6.29 | 3.51 | 2.7  |
| Skin CD4  | 4.63 | 6.16 | 4.33 | 1.16 |      |
| Skin CD8  | 0    | 2.88 | 8.57 | 1.52 |      |

$\geq 50$

|           |       |       |      |      |      |      |      |      |      |  |
|-----------|-------|-------|------|------|------|------|------|------|------|--|
| Blood CD4 | 1.27  | 1.55  | 2.52 | 3.09 | 0.00 | 2.17 | 0.72 | 2.96 | 0.77 |  |
| Blood CD8 | 2.96  | 2.44  | 2.78 | 2.19 | 0.68 | 1.12 | 0.00 | 1.40 | 0.70 |  |
| Skin CD4  | 10.00 | 17.03 | 2.80 | 8.21 | 1.28 | 0.00 |      |      |      |  |
| Skin CD8  | 0.00  | 2.86  | 1.77 | 3.68 | 1.14 | 1.37 |      |      |      |  |
