# Supplementary material for: Skin T cells maintain their diversity and functionality in the elderly
Source: PubMed Central journal article supplement (PMC7782613; doi:10.1038/s42003-020-01551-7), 2021-01-04
Supplement: 42003_2020_1551_MOESM6_ESM.pdf [file 42003_2020_1551_MOESM6_ESM.pdf]

| Age | b     |      | c        |          | d     |      |
|-----|-------|------|----------|----------|-------|------|
|     | Blood | Skin | Blood    | Skin     | Blood | Skin |
| 46  | 21859 | 4018 | 0.912602 | 0.519294 | 79    | 74   |
| 57  | 12186 | 9625 | 0.845432 | 0.835565 | 59    | 79   |
| 73  | 11667 | 5106 | 0.734162 | 0.656483 | 49    | 71   |
| 57  | 24575 | 860  | 0.827018 | 0.626599 | 71    | 81   |
| 66  | 9872  | 872  | 0.603006 | 0.476276 | 37    | 76   |
| 41  | 22040 | 2011 | 0.920657 | 0.568771 | 73    | 81   |
| 79  | 10503 | 3729 | 0.775764 | 0.712777 | 61    | 60   |
| 20  | 11407 | 546  | 0.777909 | 0.752529 | 67    | 83   |
| 48  | 23834 | 3216 | 0.852616 | 0.336519 | 80    | 76   |
| 90  | 14324 | 2789 | 0.668574 | 0.704038 | 81    | 83   |
| 83  | 11954 | 896  | 0.861136 | 0.786386 | 70    | 67   |
| 90  | 10844 | 1106 | 0.815360 | 0.568491 | 66    | 70   |
| 88  | 15136 | 7629 | 0.680319 | 0.484414 | 80    | 84   |
| 42  | 23704 | 6523 | 0.855587 | 0.380836 | 80    | 75   |
| 84  | 16459 | 3367 | 0.743318 | 0.265311 | 76    | 69   |
| 26  | 13674 | 3933 | 0.895355 | 0.500421 | 74    | 74   |

e

| % top clones occupy |       |      |       |      |      |        |       |       |       |       |         |       |      |       |       |       |
|---------------------|-------|------|-------|------|------|--------|-------|-------|-------|-------|---------|-------|------|-------|-------|-------|
| Blood               | Young |      |       |      |      | Middle |       |       |       |       | Elderly |       |      |       |       |       |
|                     | top 1 | 2.04 | 0.76  | 2.03 | 0.49 | 1.39   | 1.01  | 3.37  | 4.76  | 1.45  | 8.93    | 6.43  | 7.54 | 1.34  | 2.03  | 5.69  |
| top 5               | 5.23  | 1.87 | 4.67  | 1.52 | 3.3  | 2.24   | 7.92  | 12.20 | 5.76  | 32.57 | 15.35   | 24.04 | 3.71 | 5.35  | 15.7  | 6.06  |
| top 10              | 6.39  | 2.45 | 7.10  | 2.58 | 4.50 | 2.96   | 9.79  | 15.01 | 9.02  | 40.80 | 18.90   | 32.60 | 5.29 | 7.17  | 22.63 | 9.72  |
| top 15              | 6.80  | 2.92 | 9.04  | 3.44 | 5.39 | 3.49   | 10.77 | 17.09 | 11.59 | 45.95 | 20.85   | 37.70 | 6.48 | 8.70  | 26.56 | 12.09 |
| top 20              | 7.23  | 3.36 | 10.78 | 4.16 | 6.08 | 3.98   | 11.49 | 19.00 | 13.89 | 49.03 | 22.43   | 40.35 | 7.48 | 10.04 | 28.84 | 14.08 |

  

| Skin   | Young |       |       |       |       | Middle |       |       |       |       | Elderly |       |       |       |       |       |
|--------|-------|-------|-------|-------|-------|--------|-------|-------|-------|-------|---------|-------|-------|-------|-------|-------|
|        | top 1 | 14.60 | 22.94 | 13.85 | 23.03 | 13.75  | 7.19  | 1.36  | 6.10  | 13.35 | 52.66   | 4.50  | 7.52  | 15.72 | 34.01 | 7.15  |
| top 5  | 42.60 | 47.78 | 29.57 | 78.89 | 57.11 | 27.70  | 5.00  | 19.29 | 39.66 | 62.24 | 17.42   | 25.85 | 24.67 | 48.82 | 39.80 | 89.23 |
| top 10 | 50.98 | 60.51 | 39.43 | 91.03 | 84.25 | 43.71  | 7.45  | 25.75 | 53.57 | 67.21 | 28.54   | 35.53 | 31.02 | 60.00 | 45.41 | 90.76 |
| top 15 | 56.60 | 67.43 | 47.25 | 91.59 | 88.6  | 54.98  | 9.25  | 31.10 | 61.90 | 70.78 | 35.51   | 40.40 | 36.19 | 65.46 | 59.46 | 91.48 |
| top 20 | 61.46 | 70.55 | 53.24 | 91.90 | 89.63 | 63.46  | 10.87 | 35.86 | 68.67 | 73.38 | 40.99   | 43.62 | 40.15 | 68.77 | 69.51 | 91.92 |
