# Supplementary material for: Skin T cells maintain their diversity and functionality in the elderly
Source: PubMed Central journal article supplement (PMC7782613; doi:10.1038/s42003-020-01551-7), 2021-01-04
Supplement: 42003_2020_1551_MOESM7_ESM.pdf [file 42003_2020_1551_MOESM7_ESM.pdf]

| b   | Blood            | Skin    |
|-----|------------------|---------|
| Age | % overlap/unique |         |
| 46  | 0.03203          | 0.17422 |
| 57  | 0.06565          | 0.08312 |
| 73  | 0.54856          | 1.25343 |
| 57  | 0.17498          | 5.00000 |
| 66  | 0.21273          | 2.40826 |
| 41  | 0.32668          | 3.58031 |
| 79  | 0.66648          | 1.87718 |
| 20  | 0.14027          | 2.93041 |
| 48  | 0.08811          | 0.65299 |
| 90  | 1.15192          | 5.91610 |
| 83  | 0.31789          | 4.24108 |
| 90  | 0.31354          | 3.07415 |
| 88  | 1.28172          | 2.54293 |
| 42  | 0.03797          | 0.13798 |
| 84  | 0.26126          | 1.27711 |
| 26  | 0.13164          | 0.45767 |
