# Supplementary material for: Skin T cells maintain their diversity and functionality in the elderly
Source: PubMed Central journal article supplement (PMC7782613; doi:10.1038/s42003-020-01551-7), 2021-01-04
Supplement: 42003_2020_1551_MOESM8_ESM.pdf [file 42003_2020_1551_MOESM8_ESM.pdf]

| a   |               | b             |         | Japanese Blood |         | Epidermis Dermis |         |      |
|-----|---------------|---------------|---------|----------------|---------|------------------|---------|------|
| Age | T cell number | Swedish Blood | CD4/CD8 | Age            | CD4/CD8 | Age              | CD4/CD8 |      |
| 23  | 1038.612      | Age           | 49      | 5.0822785      | 23      | 2.025            | 47      | 4.13 |
| 34  | 1767.161      |               | 49      | 1.8865672      | 34      | 0.842            | 77      | 3.20 |
| 40  | 2500.833      |               | 70      | 1.1239316      | 40      | 7.099            | 31      | 5.11 |
| 60  | 1929.471      |               | 69      | 4.4166667      | 60      | 3.124            | 70      | 3.10 |
| 63  | 1140.216      |               | 41      | 3.9656663      | 63      | 3.278            | 17      | 5.33 |
| 68  | 1592.849      |               | 45      | 1.1666667      | 68      | 2.839            | 48      | 2.00 |
| 81  | 1863.674      |               | 40      | 2.1157556      | 81      | 1.816            | 85      | 4.20 |
| 86  | 1300.471      |               | 57      | 1.596730       | 86      | 5.117            | 48      | 7.38 |
| 89  | 870.2787      |               | 51      | 3.3466660      | 89      | 1.436            | 80      | 0.54 |
| 82  | 2153.802      |               | 45      | 2.1233333      | 82      | 2.738            | 77      | 2.00 |
| 104 | 1152.826      |               | 76      | 1.9009009      | 104     | 2.647            | 89      | 0.88 |
| 70  | 1356.641      |               | 75      | 0.0107595      | 70      | 4.893            |         |      |
| 48  | 1695.231      |               | 31      | 1.3737664      | 48      | 3.638            |         |      |
| 70  | 928.5905      |               | 61      | 1.5555556      | 70      | 2.327            |         |      |
| 35  | 1337.677      |               | 28      | 1.8974399      | 35      | 0.781            |         |      |
| 54  | 1344.193      |               | 34      | 0.0518562      | 54      | 1.756            |         |      |
| 73  | 1220.355      |               | 28      | 0.0074777      | 73      | 0.801            |         |      |

| c   |                                  | d   |                               |
|-----|----------------------------------|-----|-------------------------------|
| Age | %CD69+CD103+<br>Epidermis Dermis | Age | %CD69+CD103+<br>in CD4 in CD8 |
| 49  | 39.3                             | 47  | 7.63                          |
| 49  | 44.9                             | 77  | 15.09                         |
| 70  | 63.4                             | 31  | 12.18                         |
| 69  | 6.32                             | 74  | 30.38                         |
| 41  | 35.7                             | 64  | 26.01                         |
| 45  | 64.3                             | 96  | 49.45                         |
| 40  | 46.6                             | 83  | 22.39                         |
| 57  | 25.9                             | 81  | 36.60                         |
| 75  | 61.5                             | 51  | 38.95                         |
| 44  | 53.7                             | 70  | 27.01                         |
| 40  | 25.5                             | 63  | 28.00                         |
| 45  | 34.3                             | 64  | 39.29                         |
| 76  | 37.9                             | 90  | 22.20                         |
| 75  | 61.5                             | 88  | 36.91                         |
| 23  | 42.9                             | 70  | 26.05                         |
| 31  | 67.0                             | 83  | 12.00                         |
| 61  | 46.9                             | 30  | 30.95                         |
| 28  | 37.9                             | 42  | 21.82                         |
| 34  | 53.0                             | 26  | 51.58                         |
| 28  | 52.6                             | 17  | 24.28                         |
|     |                                  | 48  | 21.93                         |

| e   |                                                           | g   |               |
|-----|-----------------------------------------------------------|-----|---------------|
| Age | CD4 Naive T <sub>CM</sub> T <sub>EM</sub> T <sub>EM</sub> | Age | IL-13 CD4 CD8 |
| 27  | 53.78                                                     | 74  | 3.92          |
| 34  | 69.84                                                     | 64  | 3.00          |
| 45  | 65.76                                                     | 96  | 1.50          |
| 56  | 57.23                                                     | 30  | 1.50          |
| 70  | 37.52                                                     | 83  | 7.00          |
| 72  | 10.33                                                     | 42  | 1.70          |
| 73  | 63.93                                                     | 26  | 3.00          |
| 80  | 28.45                                                     | 76  | 0.20          |
| 85  | 15.71                                                     | 63  | 5.14          |
| 89  | 7.76                                                      | 66  | 0.90          |

| f   |                                                     | h    |                                  |
|-----|-----------------------------------------------------|------|----------------------------------|
| Age | CD4 T <sub>CM</sub> T <sub>EM</sub> T <sub>EM</sub> | Age  | CFSE low S <sub>au</sub> CD4 CD8 |
| 68  | 7.67                                                | 1.03 | 9.64                             |
| 33  | 9.37                                                | 1.49 | 7.68                             |
| 72  | 4.08                                                | 1.49 | 7.68                             |
| 56  | 6.88                                                | 7.10 | 4.43                             |
| 87  | 7.59                                                | 2.86 | 3.16                             |
| 74  | 4.18                                                | 7.10 | 4.43                             |
| 64  | 0.64                                                | 2.86 | 3.16                             |
| 96  | 3.06                                                | 7.10 | 4.43                             |
| 30  | 12.5                                                | 2.86 | 3.16                             |
| 83  | 16.75                                               | 7.10 | 4.43                             |
| 42  | 2.46                                                | 2.86 | 3.16                             |
| 81  | 3.77                                                | 7.10 | 4.43                             |
| 47  | 3.37                                                | 2.86 | 3.16                             |
| 51  | 2.34                                                | 7.10 | 4.43                             |
| 28  | 20.45                                               | 2.86 | 3.16                             |
| 73  | 1.29                                                | 7.10 | 4.43                             |
| 70  | 2.68                                                | 2.86 | 3.16                             |

| i   |                                                                         | j   |                                                                         |
|-----|-------------------------------------------------------------------------|-----|-------------------------------------------------------------------------|
| Age | CD4 IFN $\gamma$ CD8 IFN $\gamma$ CD4 IL-17A CD8 IL-17A CD4 TNF CD8 TNF | Age | CD4 IFN $\gamma$ CD8 IFN $\gamma$ CD4 IL-17A CD8 IL-17A CD4 TNF CD8 TNF |
| 49  | 10.8                                                                    | 49  | 0.78                                                                    |
| 49  | 10.5                                                                    | 49  | 0.75                                                                    |
| 70  | 32.3                                                                    | 70  | 1.83                                                                    |
| 69  | 0.95                                                                    | 69  | 0.17                                                                    |
| 41  | 3.49                                                                    | 41  | 0.45                                                                    |
| 45  | 15.3                                                                    | 45  | 0.61                                                                    |
| 40  | 7.58                                                                    | 40  | 0.12                                                                    |
| 57  | 12.1                                                                    | 57  | 0.0073                                                                  |
| 51  | 5.87                                                                    | 51  | 0.46                                                                    |
| 75  | 13.7                                                                    | 75  | 0.20                                                                    |
| 31  | 13.9                                                                    | 31  | 0.41                                                                    |
| 61  | 13.9                                                                    | 61  | 0.73                                                                    |
| 28  | 2.45                                                                    | 28  | 1.11                                                                    |
| 34  | 9.59                                                                    | 34  | 1.00                                                                    |
| 28  | 43.7                                                                    | 28  | 1.54                                                                    |
