# Supplementary material for: Skin T cells maintain their diversity and functionality in the elderly
Source: PubMed Central journal article supplement (PMC7782613; doi:10.1038/s42003-020-01551-7), 2021-01-04
Supplement: 42003_2020_1551_MOESM9_ESM.pdf [file 42003_2020_1551_MOESM9_ESM.pdf]

a

| Head Age | CD4<br>CD69+103+ | CD8<br>CD69+103+ |
|----------|------------------|------------------|
| 56       | 32.48            | 31.37            |
| 87       | 32.25            | 50.00            |
| 74       | 30.38            | 68.41            |
| 96       | 49.45            | 36.00            |
| 83       | 22.39            | 40.00            |
| 81       | 36.60            | 35.00            |
| 51       | 38.85            | 45.45            |

| Head Age | CD4<br>IFN $\gamma$ | CD8<br>IFN $\gamma$ |
|----------|---------------------|---------------------|
| 74       | 26.54               | 87.70               |
| 96       | 14.07               | 69.79               |
| 86       | 15.37               | 93.00               |
| 83       | 29.81               | 85.61               |

| Head Age | CD4<br>IL-17A | CD8<br>IL-17A |
|----------|---------------|---------------|
| 87       | 5.68          | 0.66          |
| 74       | 21.7          | 4.5           |
| 96       | 1.88          | 2.5           |
| 87       | 3.81          | 1.99          |
| 86       | 4.13          | 0.44          |
| 83       | 11.95         | 1.29          |
| 51       | 13            | 15            |
| 85       | 2.4           | 6.4           |

| Trunk Age | CD4<br>CD69+103+ | CD8<br>CD69+103+ |
|-----------|------------------|------------------|
| 72        | 49.29            | 46.72            |
| 64        | 26.01            | 52.83            |
| 70        | 27.01            | 46.54            |
| 63        | 28.00            | 49.77            |
| 65        | 39.29            | 25.28            |
| 90        | 22.20            | 35.00            |
| 88        | 36.91            | 34.06            |
| 70        | 26.05            | 25.00            |
| 83        | 12.00            | 37.08            |

| Trunk Age | CD4<br>IFN $\gamma$ | CD8<br>IFN $\gamma$ |
|-----------|---------------------|---------------------|
| 63        | 19.00               | 75.86               |
| 65        | 31.00               | 76.05               |
| 90        | 11.12               | 81.15               |
| 88        | 35.00               | 92.50               |
| 70        | 18.00               | 82.01               |
| 83        | 20.00               | 92.77               |
| 72        | 38.38               | 70.33               |
| 64        | 37.82               | 59.29               |
| 87        | 17.27               | 80.96               |

| Trunk Age | CD4<br>IL-17A | CD8<br>IL-17A |
|-----------|---------------|---------------|
| 63        | 1.37          | 1.86          |
| 65        | 3.57          | 0.00          |
| 90        | 1.88          | 1.23          |
| 88        | 1.25          | 0.83          |
| 70        | 7.70          | 0.80          |
| 83        | 1.31          | 2.44          |
| 72        | 7.32          | 3.96          |
| 64        | 16.8          | 0.15          |

b

| Age | CD4<br>CD69+103+<br>Flap | CD8<br>CD69+103+ |
|-----|--------------------------|------------------|
| 63  | 28.00                    | 49.77            |
| 65  | 39.29                    | 25.28            |
| 90  | 22.20                    | 35.00            |

| Age | CD4<br>IFN $\gamma$<br>Flap | CD8<br>IFN $\gamma$ |
|-----|-----------------------------|---------------------|
| 63  | 19.00                       | 75.86               |
| 65  | 31.00                       | 76.05               |
| 90  | 11.12                       | 81.15               |

| Age | CD4<br>IL-17A<br>Flap | CD8<br>IL-17A |
|-----|-----------------------|---------------|
| 63  | 1.37                  | 1.86          |
| 65  | 3.57                  | 0.00          |
| 90  | 1.88                  | 1.23          |

| Age | Transplant |       |
|-----|------------|-------|
| 88  | 36.91      | 34.06 |
| 70  | 26.05      | 25.00 |
| 83  | 12.00      | 37.08 |

| Age | Transplant |       |
|-----|------------|-------|
| 88  | 35.00      | 92.50 |
| 70  | 18.00      | 82.01 |
| 83  | 20.00      | 92.77 |
| 72  | 38.38      | 70.33 |

| Age | Transplant |      |
|-----|------------|------|
| 88  | 1.25       | 0.83 |
| 70  | 7.70       | 0.80 |
| 83  | 1.31       | 2.44 |
| 72  | 7.32       | 3.96 |
